# Supplementary material
Source: PubMed Central journal article supplement (PMC3149723)
Supplement: NIHMS307009-supplement-supplement_1.pdf [file NIHMS307009-supplement-supplement_1.pdf]

Adaptive cytokine production in early life differentially predicts total IgE and asthma through age 5

Janet Rothers, MS,<sup>1,4</sup> Marilyn Halonen, PhD,<sup>2,4</sup> Debra A Stern, MS,<sup>4</sup> I Carla Lohman, MS,<sup>4</sup> Sara Mobley, BA,<sup>4</sup> Amber Spangenberg, BS,<sup>4</sup> Dayna Anderson, BS,<sup>4</sup> and Anne L. Wright, PhD<sup>3,4</sup>

<sup>1</sup>Mel and Enid Zuckerman College of Public Health, Departments of <sup>2</sup>Pharmacology and <sup>3</sup>Pediatrics and the <sup>4</sup>Arizona Respiratory Center, College of Medicine, University of Arizona HSC, Tucson, AZ

Table E1. Regression coefficients and p-values for **log total IgE** at 1, 2, 3 and 5 years for individual cytokines (Unadjusted) and for Th2 cytokines adjusted for IFN- $\gamma$  levels (Adjusted), at 3 and 12 months.

|                           | 1 year      |                  | 2 years      |                  | 3 years      |                  | 5 years      |                  |
|---------------------------|-------------|------------------|--------------|------------------|--------------|------------------|--------------|------------------|
|                           | Coef.       | p-val            | Coef.        | p-val            | Coef.        | p-val            | Coef.        | p-val            |
| <b>3 Month Cytokines</b>  |             |                  |              |                  |              |                  |              |                  |
| Unadjusted                |             |                  |              |                  |              |                  |              |                  |
| IL-4                      | <b>0.08</b> | <b>0.040</b>     | 0.01         | 0.753            | 0.05         | 0.239            | <b>0.13</b>  | <b>0.002</b>     |
| IL-5*                     | 0.11        | 0.154            | 0.08         | 0.335            | 0.06         | 0.435            | 0.16         | 0.053            |
| IL-13                     | -0.02       | 0.690            | -0.06        | 0.177            | 0.01         | 0.823            | <b>0.09</b>  | <b>0.035</b>     |
| IFN- $\gamma$             | -0.02       | 0.610            | -0.06        | 0.145            | -0.04        | 0.350            | -0.02        | 0.586            |
| Adjusted                  |             |                  |              |                  |              |                  |              |                  |
| IL-4                      | <b>0.11</b> | <b>0.009</b>     | 0.05         | 0.255            | 0.09         | 0.061            | <b>0.18</b>  | <b>&lt;0.001</b> |
| IFN- $\gamma$             | -0.07       | 0.092            | -0.09        | 0.064            | -0.08        | 0.084            | <b>-0.10</b> | <b>0.025</b>     |
| IL-5*                     | 0.12        | 0.124            | 0.10         | 0.213            | 0.08         | 0.335            | <b>0.17</b>  | <b>0.039</b>     |
| IFN- $\gamma$             | -0.03       | 0.426            | -0.07        | 0.096            | -0.05        | 0.268            | -0.04        | 0.348            |
| IL-13                     | 0.00        | 0.990            | -0.03        | 0.611            | 0.04         | 0.364            | <b>0.14</b>  | <b>0.007</b>     |
| IFN- $\gamma$             | -0.02       | 0.531            | -0.06        | 0.248            | -0.07        | 0.248            | -0.08        | 0.086            |
| <b>12 Month Cytokines</b> |             |                  |              |                  |              |                  |              |                  |
| Unadjusted                |             |                  |              |                  |              |                  |              |                  |
| IL-4                      | <b>0.10</b> | <b>0.005</b>     | <b>0.13</b>  | <b>0.001</b>     | <b>0.17</b>  | <b>&lt;0.001</b> | <b>0.17</b>  | <b>&lt;0.001</b> |
| IL-5                      | <b>0.13</b> | <b>&lt;0.001</b> | <b>0.12</b>  | <b>0.002</b>     | <b>0.12</b>  | <b>0.001</b>     | <b>0.13</b>  | <b>0.001</b>     |
| IL-13                     | 0.04        | 0.269            | 0.04         | 0.273            | <b>0.09</b>  | <b>0.022</b>     | 0.07         | 0.074            |
| IFN- $\gamma$             | -0.02       | 0.570            | -0.04        | 0.239            | -0.02        | 0.613            | 0.00         | 0.971            |
| Adjusted                  |             |                  |              |                  |              |                  |              |                  |
| IL-4                      | <b>0.13</b> | <b>0.001</b>     | <b>0.17</b>  | <b>&lt;0.001</b> | <b>0.21</b>  | <b>&lt;0.001</b> | <b>0.21</b>  | <b>&lt;0.001</b> |
| IFN- $\gamma$             | -0.07       | 0.062            | <b>-0.11</b> | <b>0.006</b>     | <b>-0.10</b> | <b>0.014</b>     | -0.08        | 0.059            |
| IL-5                      | <b>0.14</b> | <b>&lt;0.001</b> | <b>0.14</b>  | <b>&lt;0.001</b> | <b>0.15</b>  | <b>&lt;0.001</b> | <b>0.14</b>  | <b>0.001</b>     |
| IFN- $\gamma$             | -0.06       | 0.085            | <b>-0.09</b> | <b>0.028</b>     | -0.06        | 0.118            | -0.04        | 0.329            |
| IL-13                     | 0.07        | 0.111            | 0.09         | 0.055            | <b>0.13</b>  | <b>0.003</b>     | <b>0.10</b>  | <b>0.046</b>     |
| IFN- $\gamma$             | -0.06       | 0.184            | <b>-0.09</b> | <b>0.044</b>     | -0.08        | 0.056            | -0.05        | 0.309            |

\*Dichotomized: Detectable/Undetectable.

Table E2. Odds ratios and p-values for **active asthma** at 1, 2, 3 and 5 years, for individual cytokines (Unadjusted) and for Th2 cytokines adjusted for IFN- $\gamma$  levels (Adjusted), at 3 and 12 months.

|                           | 1 year |       | 2 years    |              | 3 years    |                  | 5 years    |                  |
|---------------------------|--------|-------|------------|--------------|------------|------------------|------------|------------------|
|                           | OR     | p-val | OR         | p-val        | OR         | p-val            | OR         | p-val            |
| <b>3 Month Cytokines</b>  |        |       |            |              |            |                  |            |                  |
| Unadjusted                |        |       |            |              |            |                  |            |                  |
| IL-4                      | 1.1    | 0.863 | 1.6        | 0.163        | 1.3        | 0.366            | 1.2        | 0.423            |
| IL-5*                     | 0.9    | 0.899 | 1.8        | 0.254        | 1.2        | 0.729            | 1.0        | 0.924            |
| IL-13                     | 1.6    | 0.333 | 1.7        | 0.092        | <b>1.9</b> | <b>0.015</b>     | <b>1.7</b> | <b>0.005</b>     |
| IFN- $\gamma$             | 0.8    | 0.542 | 0.7        | 0.134        | 0.7        | 0.195            | 0.8        | 0.200            |
| Adjusted                  |        |       |            |              |            |                  |            |                  |
| IL-4                      | 1.2    | 0.675 | <b>2.3</b> | <b>0.004</b> | 1.6        | 0.133            | 1.3        | 0.205            |
| IFN- $\gamma$             | 0.7    | 0.514 | <b>0.5</b> | <b>0.005</b> | <b>0.6</b> | <b>0.046</b>     | 0.7        | 0.122            |
| IL-5*                     | 1.0    | 0.964 | 2.1        | 0.104        | 1.2        | 0.604            | 1.0        | 0.958            |
| IFN- $\gamma$             | 0.8    | 0.588 | 0.6        | 0.092        | 0.7        | 0.200            | 0.8        | 0.242            |
| IL-13                     | 2.2    | 0.086 | <b>1.5</b> | <b>0.003</b> | <b>3.0</b> | <b>&lt;0.001</b> | <b>2.3</b> | <b>&lt;0.001</b> |
| IFN- $\gamma$             | 0.5    | 0.068 | <b>0.5</b> | <b>0.005</b> | <b>0.4</b> | <b>&lt;0.001</b> | <b>0.5</b> | <b>0.009</b>     |
| <b>12 Month Cytokines</b> |        |       |            |              |            |                  |            |                  |
| Unadjusted                |        |       |            |              |            |                  |            |                  |
| IL-4                      | 1.1    | 0.750 | 1.1        | 0.676        | 1.1        | 0.810            | 1.3        | 0.147            |
| IL-5                      | 1.0    | 0.989 | 1.1        | 0.840        | 1.0        | 0.985            | 0.9        | 0.721            |
| IL-13                     | 1.0    | 0.950 | 1.0        | 0.865        | 0.9        | 0.705            | 1.1        | 0.687            |
| IFN- $\gamma$             | 1.0    | 0.915 | 1.0        | 0.833        | 0.7        | 0.104            | 1.0        | 0.875            |
| Adjusted                  |        |       |            |              |            |                  |            |                  |
| IL-4                      | 1.1    | 0.737 | 1.2        | 0.440        | 1.2        | 0.472            | 1.4        | 0.129            |
| IFN- $\gamma$             | 1.0    | 0.904 | 0.9        | 0.510        | <b>0.7</b> | <b>0.050</b>     | 0.9        | 0.507            |
| IL-5                      | 1.0    | 0.930 | 1.1        | 0.734        | 1.1        | 0.751            | 0.9        | 0.682            |
| IFN- $\gamma$             | 1.1    | 0.811 | 0.9        | 0.713        | 0.7        | 0.083            | 1.0        | 0.977            |
| IL-13                     | 1.0    | 0.992 | 1.0        | 0.934        | 1.0        | 0.883            | 1.1        | 0.553            |
| IFN- $\gamma$             | 1.0    | 0.961 | 0.9        | 0.732        | 0.7        | 0.142            | 0.9        | 0.674            |

\*Dichotomized: Detectable/Undetectable
